1 *Amylase* copy number analysis in several mammalian  
2 lineages reveals convergent adaptive bursts shaped by  
3 diet

4  
5 **Petar Pajic<sup>1,2</sup>, Pavlos Pavlidis<sup>3</sup>, Kirsten Dean<sup>1</sup>, Lubov Neznanova<sup>2</sup>, Erin Daugherty<sup>4</sup>, Rose-**  
6 **Anne Romano<sup>2</sup>, Danielle Garneau<sup>5</sup>, Anja Globig<sup>6</sup>, Stefan Ruhl<sup>2\*</sup>, Omer Gokcumen<sup>1\*</sup>**

7  
8  
9 ***Affiliations***

10 <sup>1</sup> *Department of Biological Sciences, State University of New York at Buffalo, New York 14260, USA.*

11 <sup>2</sup> *Department of Oral Biology, School of Dental Medicine, State University of New York at Buffalo, New York 14214,*  
12 *USA*

13 <sup>3</sup> *Institute of Computer Science (ICS), Foundation for Research and Technology – Hellas, Heraklion, Crete, Greece*

14 <sup>4</sup> *Cornell Center for Animal Resources and Education. Cornell University. NY 14853, USA.*

15 <sup>5</sup> *Center for Earth and Environmental Science, Plattsburgh State University, NY 12901, USA.*

16 <sup>6</sup> *Friedrich-Loeffler-Institut, Greifswald. Germany.*

17  
18  
19  
20 **\*\*correspondence:**

21 *O.G. [omergokc@buffalo.edu](mailto:omergokc@buffalo.edu)*

22 *S.R. [shruhl@buffalo.edu](mailto:shruhl@buffalo.edu)*

23  
24 **KEYWORDS:** Evolution, copy number variation, genomic structural variants, *AMY2*, *AMY1*, saliva,  
25 human commensalism, starch, adaptation, gene duplication

26

27

28

## 29 **Abstract**

30 The amylase gene (*AMY*), which codes for a starch-digesting enzyme in animals, underwent  
31 several gene copy number gains in humans<sup>1</sup>, dogs<sup>2</sup>, and mice<sup>3</sup>, presumably along with  
32 increased starch consumption during the evolution of these species. Here we present evidence  
33 for additional *AMY* copy number expansions in several mammalian species, most of which also  
34 consume starch-rich diets. We also show that these independent *AMY* copy number gains are  
35 often accompanied by a gain in enzymatic activity of amylase in saliva. We used multi-species  
36 coalescent modeling to provide further evidence that these recurrent *AMY* gene copy number  
37 expansions were adaptive. Our findings underscore the overall importance of gene copy  
38 number amplification as a flexible and fast adaptive mechanism in evolution that can  
39 independently occur in different branches of the phylogeny.

40

## 41 **Introduction:**

42 Diet has been a significant evolutionary force in shaping human and nonhuman primate  
43 variation<sup>4-6</sup>. One of the best described examples of human-specific adaptation is the expansion  
44 of the copy number of the amylase gene in concordance with the increase of starch  
45 consumption in the human lineage<sup>1</sup>. A gene duplication in the ancestor of Old World monkeys  
46 and great apes initially led to the formation of two amylase genes (*AMY2A* and *AMY2B*) with  
47 pancreas-specific expression<sup>7</sup>. Then a subsequent gene duplication in the ancestor of great  
48 apes led to the formation of *AMY1* which gained salivary gland specific expression<sup>8</sup>. In the  
49 human lineage, further gene copy number gains of *AMY1*, but not *AMY2*, led to increased  
50 expression of the *AMY1* enzyme in human saliva<sup>1</sup>. Copy numbers of amylase vary in different  
51 human populations<sup>9</sup> and correlate with the extent of traditional starch consumption in these  
52 communities dating back only 10,000 - 20,000 years<sup>1</sup>. Despite all these gene copy number  
53 gains, which are thought to be mediated by non-allelic homologous recombination<sup>1</sup>, the coding  
54 sequences of the individual gene copies remained highly conserved. This suggests that  
55 maintenance of function was adaptively relevant.

56

57 While the evolution of the amylase locus in the human lineage is well described, the evolution of  
58 this locus in other mammals is less well understood. For example, it has been shown that mice,  
59 rats, and pigs express substantial levels of salivary amylase<sup>10</sup>. However, the evolutionary  
60 dynamics that led to gain-of-expression of amylase in saliva in these lineages remain unclear.  
61 Another interesting question is the evolution of amylase in domesticated animals. Recent  
62 studies have shown that dogs have also gained multiple copies of amylase after their split from  
63 wolves within only the last 5,000 years, likely as a result of their domestication<sup>2,11</sup>. As such, the  
64 evolution of amylase in other domesticated or human commensal mammals remains an alluring  
65 area of inquiry. Similarly, our understanding of the evolution of the amylase locus within the

66 primate lineage remains limited. For example, it is not known why some Old World monkeys  
67 express substantial amylase activity levels in saliva, despite missing the great ape specific  
68 salivary amylase duplication<sup>12</sup>.

69

70 Here we address three areas of inquiry with regards to the evolution of the amylase locus in  
71 mammals: (i) Can the link between diet and amylase evolution, well-established in the human  
72 lineage, be generalized to other mammals? (ii) What are the evolutionary forces that shape  
73 amylase copy numbers in mammals? (iii) What are the genetic mechanisms leading to salivary  
74 expression in different nonhuman mammals? To answer these questions, we pursued a  
75 comprehensive investigation of amylase gene copy number and salivary expression across  
76 multiple mammalian lineages.

77

## 78 **Results and Discussion:**

79 Recurrent amylase copy number gains in multiple mammalian lineages.

80 The human-specific duplications of amylase are unique in their scope. Human genomes  
81 comprise up to 5 more haploid copies than chimpanzees. Moreover, most of these additional  
82 copies appear to contribute to expression of the amylase gene in saliva<sup>1</sup>. Therefore the recent  
83 revelation that a similar, independent, increase in amylase copy number occurred in dogs<sup>2</sup> is  
84 remarkable, since it shows that the same gene independently underwent bursts of gene copy  
85 number gains in two separate species. To investigate whether these amylase copy number  
86 gains occur in other mammalian lineages as well, we conducted a digital droplet polymerase  
87 chain reaction (ddPCR) based analysis on amylase gene copy numbers from 153 DNA samples  
88 across 44 species encompassing all major branches of the mammalian phylogenetic tree. In

89 addition to humans and dogs, we discovered similar bursts (*i.e.*, gain of more than one copy) of  
90 amylase gene copy number in house mice, brown rats, pigs, and boars (**Figure 1, Table S1**).

91  
92 Given that copy number duplications occurred in different mammalian clades (**Figure 1**), we  
93 hypothesized that these events are a result of convergent evolution. Another possible  
94 explanation would be that the ancestor of placental mammals had multiple copies of the  
95 amylase gene, which were subsequently lost in particular mammalian lineages. To distinguish  
96 between these two scenarios, we constructed a maximum likelihood tree of amylase coding  
97 sequences from available reference genomes (**Figure 2A**). Our results showed that amylase  
98 genes within a given species are more similar to each other than they are to those of other  
99 species, suggesting that the duplication of amylase genes occurred independently in each  
100 lineage.

101  
102 Samuelson *et al.* previously reported that a retrotransposon (HERV\_a\_int) was inserted  
103 upstream of a new amylase gene duplicate (*AMY1*) in the ancestor of great apes<sup>7</sup>. This copy  
104 rapidly duplicated several times in humans, carrying along the retrotransposon<sup>1</sup>. Based on this,  
105 we asked if a similar signature accounts for the copy number burst found in the mouse genome.  
106 We chose the mouse because its reference genome is adequately complete for such an  
107 analysis. Indeed, we found a mouse-lineage-specific retrotransposon (L1Md\_T) in the upstream  
108 region of 5 out of the 7 mouse amylase genes. The presence of the retrotransposon along with  
109 the duplicated copies parallels the situation in humans (**Figure 2B**). Since different  
110 retrotransposons accompanied the rapid gene copy number gains in humans and mice, we  
111 conclude that these bursts occurred independently and, thus, are potentially a result of  
112 convergent evolution.

113

114 By ddPCR analysis, we found 9-13 diploid copies of the amylase gene in brown rats (**Table S1**).  
115 Considering the close phylogenetic relationship of rats and mice, we expected that the high  
116 copy number of amylase had evolved in their rodent ancestor. However, the L1Md\_T  
117 retrotransposon is mouse-lineage specific. Therefore, the duplications in rats likely occurred  
118 independently from those in mice. We also confirmed the previous observations that dogs have  
119 gained at least 5 haploid copies of this gene over the short span of 5,000 years since their  
120 divergence from the wolf<sup>11</sup>. A similar process can be predicted for the pig and boar, whose  
121 genomes harbor 9-15 diploid copies of the amylase gene based on our analysis. In sum, our  
122 results suggest that amylase gene copy number gains have occurred recurrently in multiple,  
123 sometimes closely related, mammalian lineages.

124 Amylase expression in saliva was facilitated through recurrent gene copy  
125 number gains independently in different mammalian lineages

126 Ancestral form of amylase in mammals codes for a pancreatic enzyme. However, in certain  
127 mammalian species, amylase also became expressed in saliva<sup>13</sup>. In humans, this acquisition of  
128 salivary gland-specific expression has been well documented<sup>14</sup>. It has been shown that the  
129 aforementioned retrotransposon insertion along with the *AMY1* duplicate in the ancestor of great  
130 apes is responsible for tissue-specific expression of this gene in salivary glands<sup>7</sup>. Previous  
131 studies also hypothesized that an independent, but similar gene duplication event led to the  
132 salivary expression of amylase in mice<sup>8</sup>. It remains unresolved whether the mechanism that  
133 enabled expression of amylase in mouse saliva is similar to that determined for humans.  
134 Moreover, even though various reports showed salivary expression of amylase in different  
135 mammalian species<sup>12</sup>, a comprehensive and systematic analysis of salivary expression of  
136 amylase across the mammalian clade is still missing.

137

138 To fill these gaps in knowledge, we performed a screen across the mammalian phylogeny to  
139 investigate which lineages express amylase activity in saliva. We used a two-pronged approach,  
140 comprising a starch lysis plate assay (**Figure 3A**) and a high-sensitivity in-solution fluorescence-  
141 based assay (**Figure 3B**). This approach provides the most comprehensive documentation of  
142 salivary amylase activity in mammals, encompassing 118 saliva samples across 20 species  
143 (**Table S1**). This is a significant contribution given that previous studies varied considerably in  
144 sample preparation, methods of analysis, and sensitivity<sup>12</sup>.

145  
146 Our results showed that amylase activity in saliva is more widespread among mammals than  
147 previously thought (**Figure 3B**). In addition to species that were already known to express  
148 amylase in their saliva, we observed salivary activity in boars, dogs, deer mice, woodrats, and  
149 giant African pouched rats (**Table S1**). It is important to note here that our findings also suggest  
150 that salivary amylase activity in dogs varies from breed to breed (**Figure S1, Table S1**).

151  
152 We surmised two competing scenarios to explain the observation that multiple mammalian  
153 lineages express amylase in their saliva. First, there could be independent gains of amylase  
154 expression in saliva spanning multiple lineages. Second, salivary expression of amylase could  
155 be an ancestral trait that was subsequently lost in most species. The above-described  
156 independent evolution of amylase gene copies in humans and mice supports the former  
157 hypothesis.

158  
159 To further investigate this, we asked which of the mouse amylase copies is expressed in  
160 salivary glands by mapping available parotid salivary gland RNA-Seq data<sup>15</sup> to the mouse  
161 reference genome (mm9) (**Figure S2**). We found that the copy annotated as mouse *AMY1*  
162 (**Figure 2**) is expressed in salivary glands, and is likely responsible for salivary expression of  
163 amylase in mice, while the other amylase duplicates have a negligible expression in salivary

164 gland tissue (**Figure S2**). Mouse *AMY1* has an amino acid sequence distinct from the other  
165 amylase copies in the mouse genome. This distinct sequence is shared with rats and other  
166 rodents (e.g., deer mouse, vole, mongolian gerbil, golden hamster), indicating that the  
167 duplication event that led to formation of *AMY1* likely has occurred in an ancestor of muroidea.

168

169 Even though more work will be needed to understand the regulatory mechanisms through which  
170 amylase gained salivary expression in pigs, boars, dogs, multiple rodents, and some Old World  
171 monkeys, it seems gene duplication is the required initiating step. Indeed, we found that the  
172 overall amylase gene copy numbers in species correlate well with observable enzymatic activity  
173 in saliva (**Figure 3C**). In fact, we could not find a species that underwent a “burst” of amylase  
174 gene copy number that did not show concurrent salivary amylase activity. Importantly, previous  
175 studies surmised that dogs do not express salivary amylase<sup>2</sup>, while we show here that several  
176 dog breeds express substantial amounts of this enzyme (**Figure S1**). This variable expression  
177 of amylase in saliva among different dog breeds makes this species an ideal model to study the  
178 mechanism of gain-of-expression in a new tissue facilitated by gene duplication. Overall, we  
179 conclude that the salivary activity of amylase has recurrently evolved in multiple mammalian  
180 lineages through gene duplication, where one or more of the duplicates have gained salivary  
181 gland expression.

## 182 Varied diets correlate with increased amylase copy number

183 For humans, it has been postulated that starch consumption exerted a positive adaptive force  
184 on maintaining high amylase copy numbers<sup>1</sup>. Furthermore, the rapid copy number increase in  
185 dogs has been associated with their change in diet during domestication<sup>2</sup>. Based on these  
186 previous studies, we hypothesized that gains in copy number and the associated gain of  
187 amylase expression in saliva are likely driven by starch consumption. When we compared the  
188 amylase copy numbers in mammals that consume specialized diets (strict carnivores and non-



189 fruit eating herbivores) to those with broad-ranged diets, we found that the latter harbor  
190 significantly higher copy numbers of the amylase gene ( $p=2.1 \times 10^{-7}$ , **Mann-Whitney Test,**  
191 **Figure 4A**). We also found that the species consuming broad-ranged diets express significantly  
192 higher salivary amylase activity than those consuming specialized diets ( $p=5.5 \times 10^{-4}$ , **Mann-**  
193 **Whitney Test, Figure 4B**).

194  
195 We then asked whether starch consumption is the main driver of the copy number gains and  
196 salivary expression of amylase. Unfortunately, there is no systematic survey of starch  
197 consumption among mammals, and the diet varies among subspecies, and even among  
198 populations of the same species<sup>16</sup>. As such, we could not reliably assess whether starch  
199 consumption by itself explains the copy number variation and salivary expression of the  
200 amylase gene. However, among all the species that consume a broad-ranged diet, we found  
201 that those who over recent evolutionary time have gained access to abundant starch-rich foods  
202 - either through domestication (as in the case of dogs and pigs) or through dietary  
203 commensalism with humans (as in the case of house mice as well as brown and black rats)  
204 harbor significantly higher copy number of the amylase gene ( $p=1.2 \times 10^{-4}$ , **Mann-Whitney**  
205 **Test, Figure 4A**). For salivary expression of amylase, this difference was not significant. This  
206 could potentially be due to the fact that most, if not all the species that consume a broad-ranged  
207 diet also consume starch to varying degrees.

208  
209 Next, we conducted a comparative investigation of amylase copy number and its salivary  
210 expression between human-interacting species and their closest evolutionary relatives in the  
211 wild. In dogs, which due to their commensalism with humans consume a higher amount of  
212 starch than wolves, we noted a substantial increase over its ancestral state, not only in amylase  
213 gene copy number<sup>2</sup>, but also in salivary expression of amylase (**Figure 3C, Figure S1**). This  
214 increase was found less substantial in species that already consumed starch in their ancestral

215 state (e.g. mice and rats which are granivorous). Along the same lines, we found no difference  
216 between domesticated pigs and wild boars. This could be explained because boars already  
217 consumed starch in amounts comparable to those of pigs. In fact, previous observations  
218 showed that boars and humans have similar starch-rich ancestral diets due to their consumption  
219 of underground starch-containing storage stem tissues known as tubers<sup>17</sup>.

## 220 Evolution of amylase in primates

221 To understand how the broader trend of amylase evolution is reflected in the primate phylogeny,  
222 we have investigated multiple primate species, both for amylase gene copy number and salivary  
223 amylase activity (**Figure 5**). We confirmed previous studies which documented a duplication of  
224 the amylase gene in the ancestral population of the catarrhini and another duplication in the  
225 ancestral population of the great apes<sup>8</sup>. Among Old World monkeys, we found additional  
226 amylase gene copies in rhesus macaques, baboons, and vervets. In contrast, we found no  
227 additional gene duplication in leaf-eating old world monkeys (colobus, snub-nose and proboscis  
228 monkeys)<sup>18</sup>. Most New World monkey genomes that we tested carry 4 diploid amylase copies.  
229 Assuming that the ancestral state of this lineage had 2 copies, our results suggest another  
230 instance of gene copy number gain in the ancestor of New World monkeys. Moreover, we found  
231 an additional amylase copy in the capuchins, which consume more starch than other New World  
232 monkeys<sup>19,20</sup>. Next, we investigated lemurs, an outgroup primate species to monkeys and great  
233 apes, and found that they indeed only harbor 2 diploid copies of the amylase gene (**Figure 5**).  
234 This result in the lemur lineage, combined with the previous reports that ancestors of simians  
235 have a single copy<sup>7,21</sup>, suggest that primate ancestors had only one haploid copy of the amylase  
236 gene.

237

238 Next we investigated whether variation in amylase gene copy numbers among primates  
239 translates into salivary expression, as we have shown for nonprimate mammals. We found that

240 several species of Old World monkeys, including rhesus macaques and baboons, express  
241 abundant salivary amylase (**Figure 5**). These primates are known for their cheek pouches to  
242 store food for prolonged oral predigestion<sup>22</sup>, and previous studies have documented salivary  
243 activity of amylase in baboons<sup>23</sup>. New World monkeys consume even more diverse diets than  
244 Old World monkeys. For example, marmosets primarily consume insects and plant exudate<sup>24</sup>,  
245 while owl monkeys consume flowers, insects, nectar, and leaves<sup>20,25</sup>. Capuchin monkeys  
246 consume fruits, bulbs and seeds<sup>19,20</sup>. In agreement with these dietary habits we found little or no  
247 salivary activity of amylase in New World monkeys. The only exception were capuchins, which  
248 we discovered to express salivary amylase, and which also consume a higher proportion of  
249 starch in their diet compared to the others (**Figure 5**).

250

251 Combined, our results in primates document additional instances where lineage-specific  
252 duplications of the amylase gene in the cheek pouched cercopithecines and capuchins coincide  
253 with salivary expression. Broadly, our results suggest that the evolution of the amylase locus in  
254 primates follows the general trends observed for all mammals in that dietary strategies rapidly  
255 shape both the copy number and salivary expression in a lineage specific manner.

## 256 Modeling the evolution of amylase copy number

257 Our empirical analyses of amylase copy number variation across mammals clearly show a trend  
258 where animals consuming high amounts of starch, carry higher copy numbers of this gene  
259 (**Figure 4A**). This aligns well with the hypothesis that high amylase copy number is adaptively  
260 maintained in these lineages<sup>8</sup>. To formally test this hypothesis, we simulated the copy number in  
261 100 animal species (available through Hg19 100way conservation alignment<sup>26</sup>) under the  
262 assumption of neutrality (see Methods section) (**Table S4, Figure S3**). In our simulations none  
263 of the neutral models could explain the observed copy number variation in the amylase locus.  
264 On one hand, simulations under higher mutation rates could not explain the observation that

265 certain distantly related mammalian lineages such as humans, dogs, pigs, mice, and rats harbor  
266 similar amylase copy numbers. While on the other hand, simulations under low mutation rates  
267 could not explain the observation that certain closely related species, such as humans and  
268 chimpanzees or wolves and dogs, harboring substantially different amylase copy numbers.  
269 Thus, this simulation-based analysis shows that the observed copy number variation among  
270 mammals cannot be explained by neutral evolution alone. In the light of the empirical analyses  
271 described in this study, we argue that the most parsimonious explanation is that lineage-  
272 specific, convergent adaptive forces have shaped copy number variation of the amylase gene  
273 among mammalian species.

## 274 **Conclusion:**

275 Our results reveal a staggering diversity of amylase gene copy numbers across extant  
276 mammals that correlates with starch consumption. We report multiple bursts of amylase copy  
277 number gains that occurred independently in different lineages. Furthermore, our results  
278 showed that each of these bursts led to expression of amylase in saliva, providing a case  
279 example of convergent evolution of gene regulation by structural variation in a diet-related gene.

280

281 Our results also raise intriguing questions that could not be resolved in this study: 1. How do  
282 putative salivary gland-specific enhancers evolve along with the gene copy number to lead to  
283 amylase expression in salivary gland tissue? 2. Is there any functional variation among amylase  
284 gene copies, either through sequence variation or differences in post-translational  
285 modifications? 3. Why and how can diet have such a dramatic adaptive effect on copy number  
286 of a gene, and what are the selective advantages gained by increased expression of amylase in  
287 saliva? Our results showed that phylogenetically distant species with diverse food preferences  
288 and habitats have evolved similar amylase gene copy numbers, which correlate well with known

289 levels of starch consumption. This fits into an evolutionary explanation where increase in copy  
290 number leads to higher amylase expression, which in-turn allows rapid and effective intestinal  
291 digestion of starch.

292

293 We further showed that amylase is expressed in the saliva of species consuming a broad-  
294 ranged diet. Most mammalian species, including humans, primarily digest starch in their  
295 digestive tract rather than in the oral cavity. As such, a simple explanation based on digestion  
296 alone fails to fully explain the gain of salivary expression of this gene even in high starch-  
297 consuming species. Based on our results, we argue that such putatively adaptive expression of  
298 amylase in saliva depends on the ecological and behavioral context of the species and, thus, is  
299 lineage-specific. For example, it is remarkable to see the dramatic increase of salivary amylase  
300 activity in the cheek-pouched Old World monkeys, which conduct almost half of their starch  
301 digestion in their oral cavity. In other species, food is not retained long enough in the mouth for  
302 substantial starch digestion to take effect. Consequently, indirect effects of salivary amylase  
303 activity other than solely digestion may also play a role in how natural selection acted on the  
304 regulation of this gene. In this context, other studies found links between salivary amylase and  
305 taste perception<sup>27</sup>, metabolic regulation<sup>28</sup>, and bacterial composition in the oral cavity<sup>29,30</sup>.  
306 Overall, one can argue that presence of amylase enzymatic activity in saliva may shape food  
307 preference and even niche partitioning among omnivorous mammals living in starch-rich  
308 ecologies, followed by coevolution with the oral microbiome.

309

## 310 **Methods**

### 311 **Samples**

312 We chose our panel of mammalian species based on their phylogeny, diet preference  
313 (carnivore, herbivore, omnivore), domestication, and commensal relationship with humans.

314 Overall we compiled 153 DNA samples from 44 different species and 118 saliva samples from  
315 20 different species. Detailed information about the samples used in this study and their sources  
316 can be found in **Table S2**. The diet information for individual species was mostly acquired from  
317 Michigan Animal Diversity Web (<https://animaldiversity.org/>), unless other more specific studies  
318 were cited.

319

### 320 **Genomic analysis**

321 DNA was isolated from buccal swabs and saliva using a commercially available kit  
322 (ChargeSwitch® gDNA Buccal Cell Kit, Invitrogen). DNA extraction from blood and cell lines  
323 was conducted as described previously<sup>31</sup>. The DNA was analyzed by digital droplet PCR  
324 (ddPCR) to determine amylase gene copy number. For primer design we targeted amylase  
325 exonic sequences that are conserved among copies and between species. The primer sets  
326 used for each species are listed in **Table S3**. In most species, ddPCR results were highly  
327 concordant with copy number estimations based on BLASTx and BLASTp analysis (**Figure S4**).  
328 Only in certain species, disparities between our ddPCR results and existing databases were  
329 noted (**Table S1, Figure 3C**).

330

### 331 **Phylogenetic analysis**

332 Amino acid sequences translated from reference genomes for the amylase gene copies were  
333 downloaded from NCBI. Sequences were aligned and a phylogenetic output was generated  
334 using a custom *Python* code as described previously<sup>32</sup>. We constructed a maximum likelihood  
335 tree from the protein sequences using RAxML<sup>33</sup>, bootstrapping with 1000 replicates for branch  
336 support. Visualization was performed using FigTree<sup>34</sup>.

337

### 338 **Measurement of amylase enzymatic activity**

339 We used two methods to measure salivary amylase activity. First, we conducted a direct  
340 measurement of enzyme activity using a starch lysis agar plate (**Figure 3A**) following a  
341 previously described protocol<sup>35</sup>. In parallel, we used a high-sensitivity (detection limit  $2 \times 10^{-3}$   
342 U/ml) microtiter plate assay (EnzCheck *Ultra* Amylase Assay Kit, Invitrogen) following the  
343 manufacturer's protocol and using  $\alpha$ -amylase from human pancreas (Sigma) as the standard .  
344 Total protein concentrations were measured using the bicinchoninic acid (BCA) assay (micro-  
345 BCA, BioRad) with bovine serum albumin as the standard. Optical density measurements were  
346 performed using the Nanodrop 2000 spectrophotometer (Thermo Fisher).

347

### 348 **Simulations**

349 We simulated the neutral intra- and inter-species copy number variation in 100 animal species  
350 using the software CoMuS<sup>36</sup> and the phylogenetic tree provided by the UCSC Genome Browser  
351 (<http://hgdownload.cse.ucsc.edu/goldenpath/hg19/multiz100way/>). The original version of  
352 CoMuS performs neutral multi-species coalescent simulations, thus it separates the coalescent  
353 process from the mutation process. This assumption, however, may be inappropriate for  
354 studying the evolution of copy number since the mutation rate at a specific lineage at time  $t$ ,  
355 may depend on the present copy numbers on this lineage at time  $t$ . For example, on the one  
356 hand, a large number of copies present may imply an increased mutation rate. On the other  
357 hand, a small number of copies present may result in a decreased mutation rate. At the  
358 extreme, zero copies represent an absorbing state, i.e. no further changes are possible. Also,  
359 for a single copy, a reasonable assumption is that a gain should occur more frequently than a  
360 loss. Such assumptions related to the neutral copy number evolution result in a dependence of  
361 the mutation rate on the pre-existing copy number state. Thus, we implemented a modified  
362 version of CoMuS, where genealogies are simulated first, and thereafter mutations occur along  
363 the branches using a pre-order traversal of the tree: each mutation may affect the mutation rate  
364 on each subtree that has inherited it. We simulated neutral copy number variants for a total of

365 300 individuals, that is 3 individuals for each of the 100 species of the guide phylogenetic tree  
366 (**Table S4**). The modified version of CoMuS that we used here can be downloaded from  
367 <https://github.com/idaios/comuscny>.

368

### 369 **Data analyses and figures**

370 All the input data are provided in **Tables S1** and **S4**. We used custom scripts to analyze data  
371 and produce the figures primarily using the R statistical package.

372



373 **Acknowledgements:**

374 We would like to recognize and thank all the individuals and institutions who provided us with  
375 DNA and saliva samples from different mammalian species: Joseph Cook and Mariel Campbell  
376 (Museum of Southwestern Biology, Division of Genomics Resources, University of New  
377 Mexico), Coriell Institute for Medical Research, Karen Davis (Wolf Park, Battle Ground, IN),  
378 Barbara McCabe (SUNY at Buffalo), Luce E. Guanzini (Center for Animal Resources and  
379 Education, Cornell University), Klaus Depner (Friedrich-Loeffler-Institut, Greifswald, Germany),  
380 Ann-Marie Torregrossa (SUNY at Buffalo; Department of Psychology), Michele Skopec (Weber  
381 State University; Department of Zoology), Jill Kramer (SUNY at Buffalo; Department of Oral  
382 Biology), Kurt Volle, Alicia Dubrava and fellow gorilla caretakers of the Buffalo Zoo, the  
383 Southwest National Primate Research Center funded by NIH grant ORIP/OD P51OD011133,  
384 the Yerkes National Primate Research Center which is funded by NIH grant ORIP/OD  
385 P51OD011132), and the Duke Lemur Center funded by NSF grant LSCBR #1050035.

386

387 We would also like to thank Ozgur Taskent, Jessica Poulin, Trevor Krabbenhoft, and Derek  
388 Taylor for careful proofreading of this manuscript and discussions to better present the data and  
389 Aggelos Koropoulis for the implementation of CoMuSCNV,

390

391 This study was funded by National Institute of Dental and Craniofacial Research grants  
392 DE019807 and DE025826 (SR).

393

394 **FIGURES:**

395 **Figure 1: *Amylase* gene copy number bursts across mammals.** Boxes represent haploid  
 396 amylase gene copies among clades or of representative species across the mammalian  
 397 phylogeny (see **Table S1** for a comprehensive dataset). Light-colored boxes represent the  
 398 variation in copy numbers found in at least two individuals of a given species or in reference  
 399 genomes of at least two species within a clade.

400

401 (a)

402

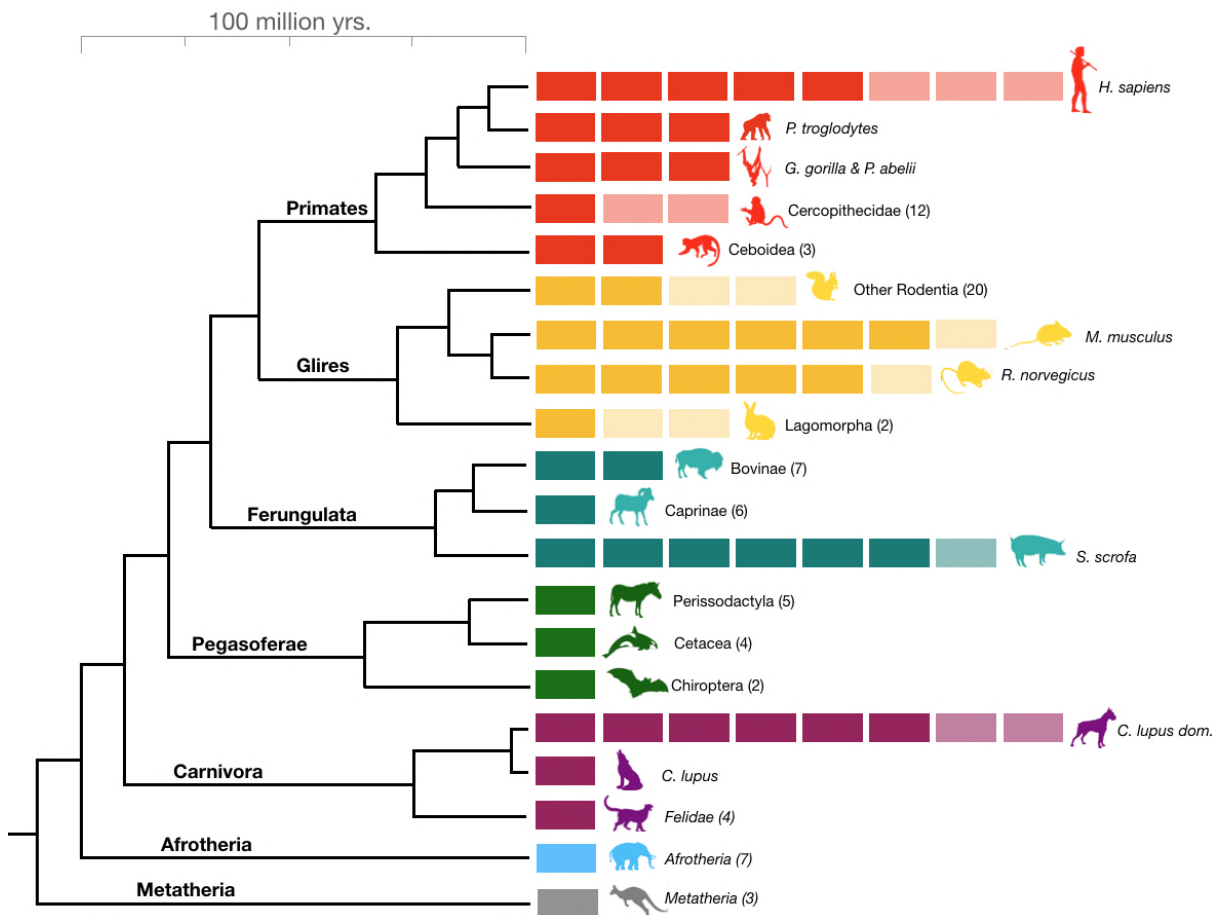

403

404

405

406 **Figure 2: Amylase duplications evolved recurrently. (a)** Maximum likelihood tree  
 407 constructed using amylase protein sequences translated from reference genomes. **(b)** Depiction  
 408 of the retrotransposons linked with amylase copies in mouse and human genomes. Small boxes  
 409 symbolize the positions of mobile elements, HERVE\_a-int LTR for humans (blue) and L1Md\_T  
 410 for mouse (purple). The dotted arrows indicate the likely origin of derived gene duplicates.  
 411  
 412

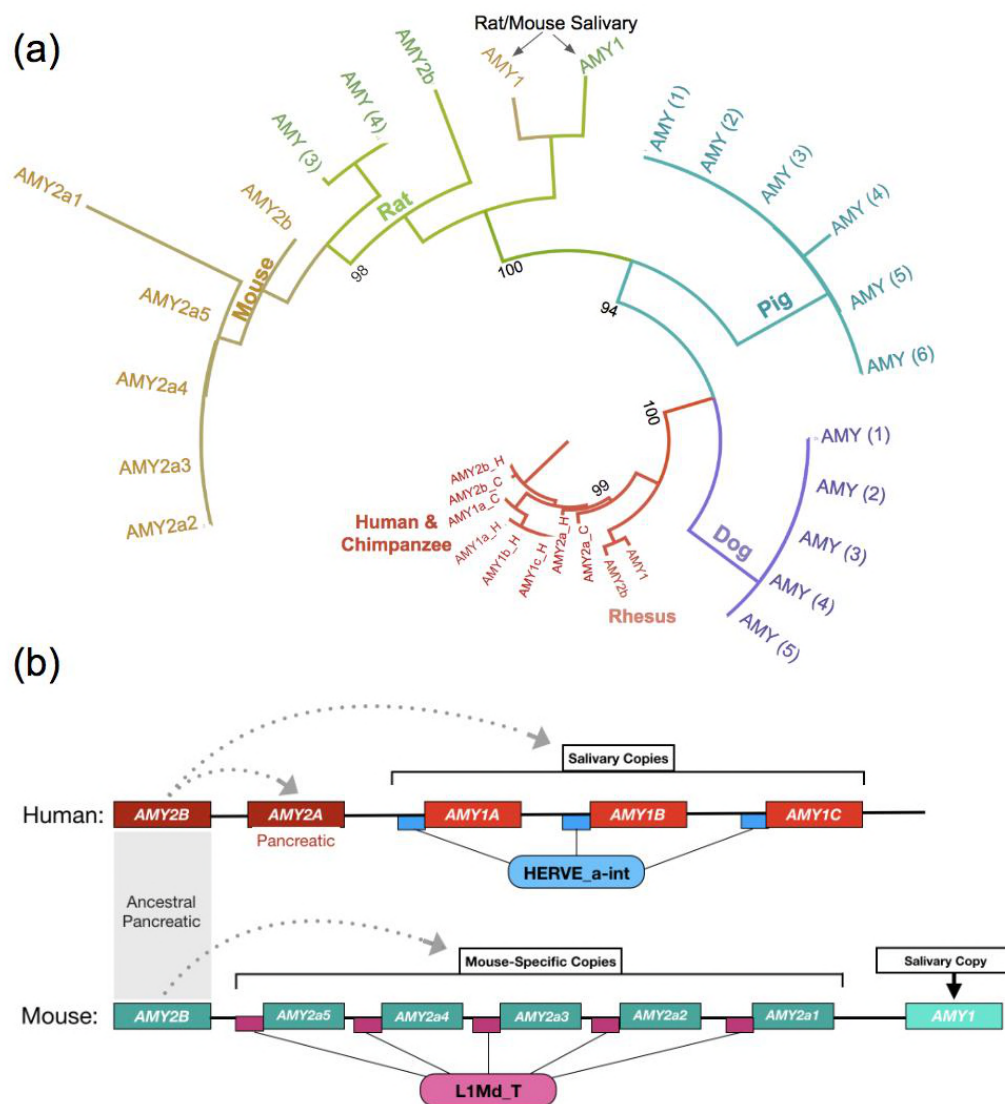

413

414

415

416 **Figure 3: Salivary amylase activity and relationship to gene copy number. (a)** A  
 417 representative starch lysis assay plate showing the activity levels of amylase in the saliva of  
 418 various mammalian species. **(b)** Density plots showing salivary amylase activity in different  
 419 species. Full dataset can be found in **Table S1**. **(c)** Correlation of amylase activity and gene  
 420 copy number in multiple different species. Data obtained by direct genotyping are represented  
 421 by filled circles, while data estimated from reference genomes or through genotyping of other  
 422 samples from the same species are represented by empty circles.

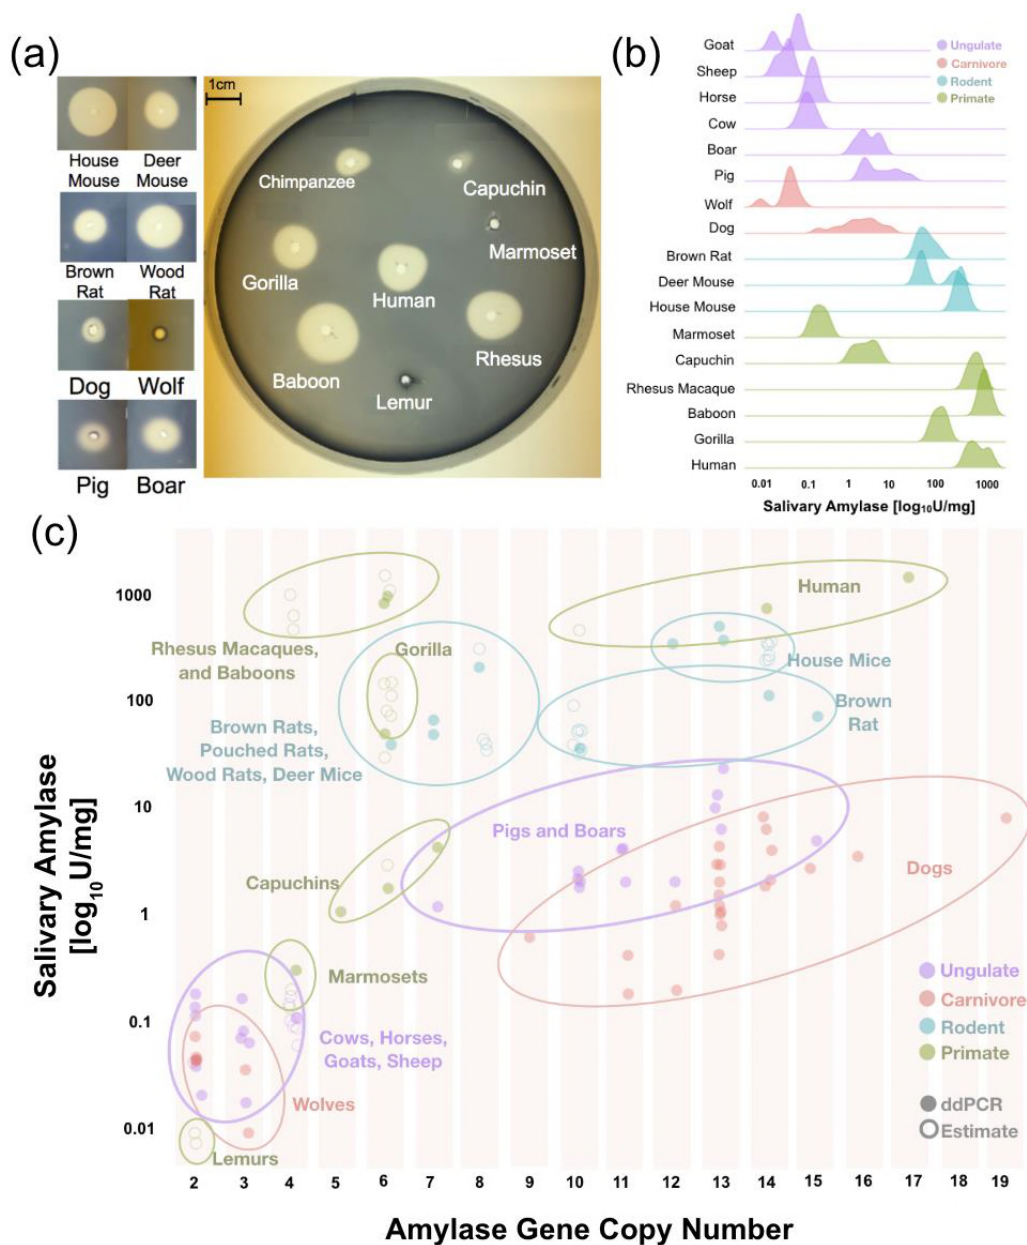

423

424 **Figure 4: Amylase gene copy numbers and salivary enzyme activity correlate with diet.**

425 Box plot representing (a) AMY gene copy numbers or (b) salivary amylase activities in  
426 mammalian species assigned by their major diet. These include either as a specialized  
427 (carnivore or herbivore) or broad ranged diet. Dots and squares represent wild and  
428 domesticated species, respectively. Species that thrive in a commensal relationship with  
429 humans are shown in red while all others are shown in blue.

430

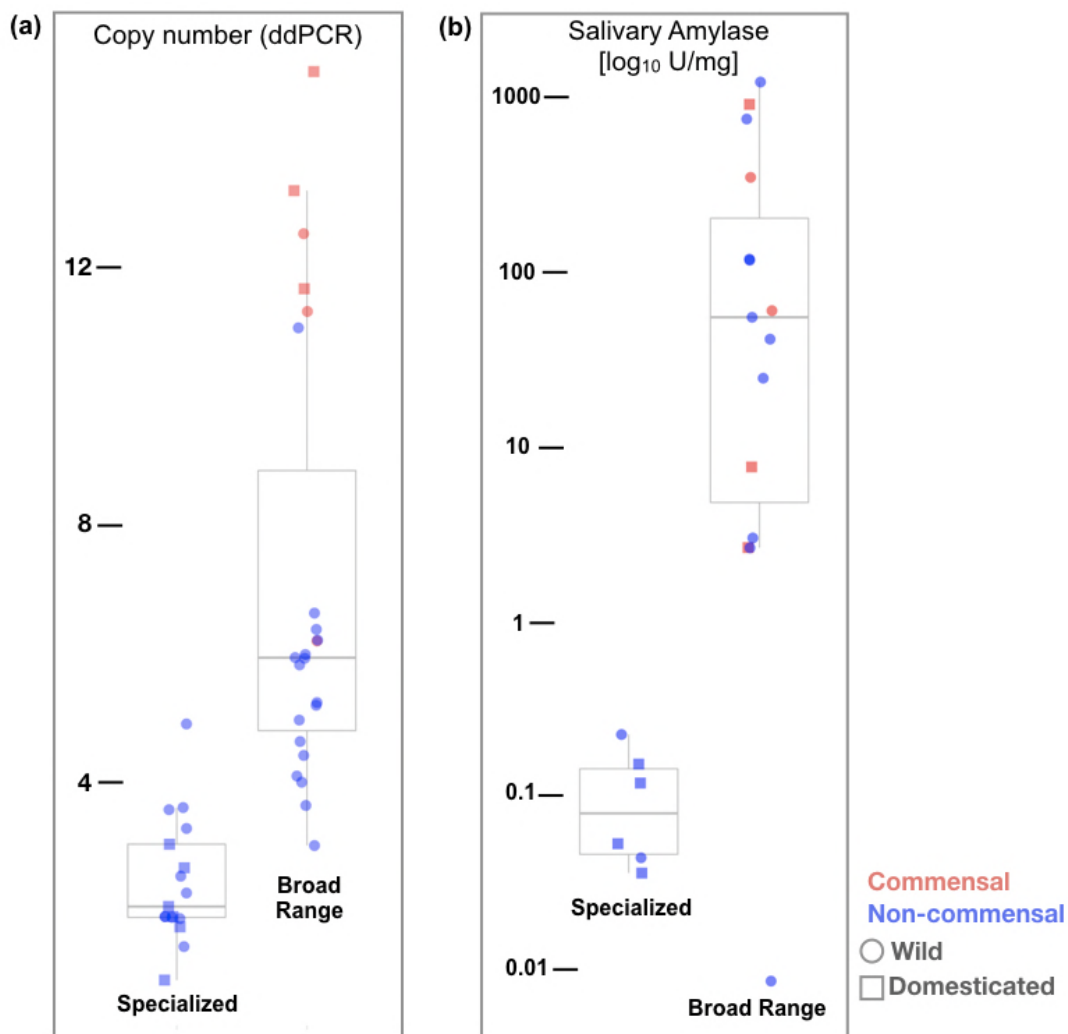

431

432

433 **Figure 5: Amylase duplication events and salivary activities in the primate phylogeny.**

434 Bars represent mean amylase activity levels. Orange dots in the branches of the phylogenetic  
 435 tree show independent duplication events of the amylase gene. The phylogeny represents the  
 436 panel of primates we have obtained data for by ddPCR (*AMY* copy number in parentheses) or  
 437 reference genome database information (copy number, grey, in brackets). The red X indicates  
 438 an assumed copy number loss. Phylogenetic branches are colored according to diet  
 439 preferences (see boxed insert). Abbreviations: G.M., green monkey; V, vervet; A.S., Allen's  
 440 swamp monkey.

441 (a)

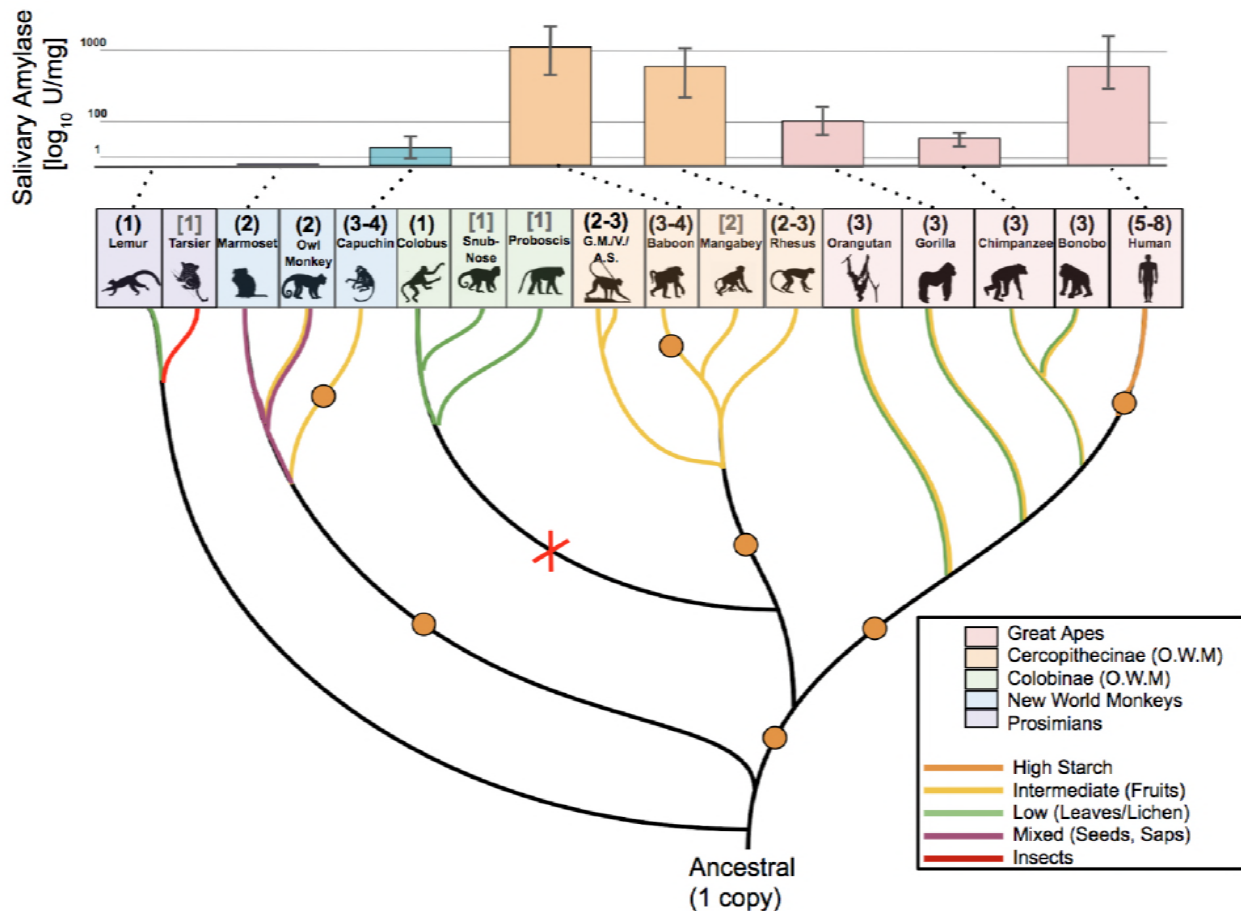

442

## 443 **Supplementary Figures:**

444 **Figure S1: Dog copy number versus salivary amylase activity.** X-axis represents the  
445 haploid copy number of various dog breeds, (see **Table S1** for breeds). Y-axis represents the  
446 salivary enzymatic activity for the same sample. A trendline was applied to show correlation.  
447 Red dots represent individual dog sample.

448 **Figure S2: RNA-sequencing for expression of amylase genes in mouse salivary gland.**  
449 Green boxes on the x-axis represent the gene order on the mouse reference genome. The y-  
450 axis is drawn in log scale and represents the fragments per kilobase of exon per million reads  
451 (FPKMS) from RNA sequencing. The purple bars designate the average FPKMS read coverage  
452 for RNA from 2 adult mice (12 weeks of age) for their parotid salivary glands. The gene  
453 schematic diagram displays the RNA sequencing coverage across the exons of *AMY1*. Data  
454 were extracted from Gluck et al.<sup>15</sup>.

455 **Figure S3: Simulation results.** To visualize our simulated dataset, we plotted the phylogenetic  
456 distance between species in a pairwise fashion on the x-axis and the absolute copy number  
457 difference between species on the y-axis. Phylogenetic distance is defined as the total length of  
458 the branches that separate two species. The phylogenetic tree was downloaded from the UCSC  
459 multiz100way file related to humans. The mutation rates for different simulations are noted near  
460 the lines. Mutation rates correspond to  $4N_e\mu$ , where  $N_e$  is the effective population size, and  $\mu$  the  
461 mutation rate per locus and per generation. The upper graph shows simulations across all  
462 species contained in the multiz100way database  
463 (<http://hgdownload.cse.ucsc.edu/goldenpath/hg19/multiz100way/>). The bottom diagram focuses  
464 on the mammalian species under investigation in this study. The observed data (red dots) and  
465 the red fitted-line were superimposed on the simulation results.

466 **Figure S4: Reference Genome Accuracy.** The y-axis represents the haploid copy number  
467 data obtained from available references genomes. The x-axis represents our ddPCR copy

468 number data for 27 different species. A linear regression line is plotted to visualize the  
469 correlation.



470 **References:**

- 471 1. Perry, G. H. *et al.* Diet and the evolution of human amylase gene copy number variation.  
472 *Nat. Genet.* **39**, 1256–1260 (2007).
- 473 2. Axelsson, E. *et al.* The genomic signature of dog domestication reveals adaptation to a  
474 starch-rich diet. *Nature* **495**, 360–364 (2013).
- 475 3. Schibler, U. *et al.* The mouse  $\alpha$ -amylase multigene family sequence organization of  
476 members expressed in the pancreas, salivary gland and liver. *J. Mol. Biol.* **155**, 247–266  
477 (1982).
- 478 4. Hardy, K., Brand-Miller, J., Brown, K. D., Thomas, M. G. & Copeland, L. The Importance of  
479 Dietary Carbohydrate in Human Evolution. *Q. Rev. Biol.* **90**, 251–268 (2015).
- 480 5. Milton, K. Distribution Patterns of Tropical Plant Foods as an Evolutionary Stimulus to  
481 Primate Mental Development. *Am. Anthropol.* **83**, 534–548 (1981).
- 482 6. Zhang, J., Zhang, Y.-P. & Rosenberg, H. F. Adaptive evolution of a duplicated pancreatic  
483 ribonuclease gene in a leaf-eating monkey. *Nat. Genet.* **30**, 411–415 (2002).
- 484 7. Samuelson, L. C., Wiebauer, K., Snow, C. M. & Meisler, M. H. Retroviral and pseudogene  
485 insertion sites reveal the lineage of human salivary and pancreatic amylase genes from a  
486 single gene during primate evolution. *Mol. Cell. Biol.* **10**, 2513–2520 (1990).
- 487 8. Meisler, M. H. & Ting, C. N. The remarkable evolutionary history of the human amylase  
488 genes. *Crit. Rev. Oral Biol. Med.* **4**, 503–509 (1993).
- 489 9. Usher, C. L. *et al.* Structural forms of the human amylase locus and their relationships to  
490 SNPs, haplotypes and obesity. *Nat. Genet.* **47**, 921–925 (2015).
- 491 10. Boehlke, C., Zierau, O. & Hannig, C. Salivary amylase - The enzyme of unspecialized  
492 euryphagous animals. *Arch. Oral Biol.* **60**, 1162–1176 (2015).
- 493 11. Botigué, L. R. *et al.* Ancient European dog genomes reveal continuity since the Early  
494 Neolithic. *Nat. Commun.* **8**, 16082 (2017).

- 495 12. Janiak, M. C. Digestive enzymes of human and nonhuman primates. *Evol. Anthropol.* **25**,  
496 253–266 (2016).
- 497 13. Chauncey, H. H., Henrigues, B. L. & Tanzer, J. M. Comparative Enzyme Activity of Saliva  
498 from the Sheep, Hog, Dog, Rabbit, Rat, and Human. *Arch. Oral Biol.* **8**, 615–627 (1963).
- 499 14. Ting, C.-N., Rosenberg, M. P., Snow, C. M., Samuelson, L. C. & Meisler, M. H.  
500 Endogenous retroviral sequences are required for tissue-specific expression of a human  
501 salivary amylase gene. *Genes Dev.* **6**, 1457–1465 (1992).
- 502 15. Gluck, C. *et al.* RNA-seq based transcriptomic map reveals new insights into mouse  
503 salivary gland development and maturation. *BMC Genomics* **17**, 923 (2016).
- 504 16. Pineda-Munoz, S. & Alroy, J. Dietary characterization of terrestrial mammals. *Proc. Biol.*  
505 *Sci.* **281**, 20141173 (2014).
- 506 17. Hatley, T. & Kappelman, J. Bears, pigs, and Plio-Pleistocene hominids: A case for the  
507 exploitation of belowground food resources. *Hum. Ecol.* **8**, 371–387 (1980).
- 508 18. Hohmann, G. The Diets of Non-human Primates: Frugivory, Food Processing, and Food  
509 Sharing. in *The Evolution of Hominin Diets: Integrating Approaches to the Study of*  
510 *Palaeolithic Subsistence* (eds. Hublin, J.-J. & Richards, M. P.) 1–14 (Springer Netherlands,  
511 2009).
- 512 19. Galetti, M. & Pedroni, F. Seasonal diet of capuchin monkeys (*Cebus apella*) in a  
513 semideciduous forest in south-east Brazil. *J. Trop. Ecol.* **10**, 27–39 (1994).
- 514 20. Rowe, N. & Myers, M. *All the World's Primates*. (Pogonias Press, 2016).
- 515 21. Samuelson, L. C., Phillips, R. S. & Swanberg, L. J. Amylase gene structures in primates:  
516 retroposon insertions and promoter evolution. *Mol. Biol. Evol.* **13**, 767–779 (1996).
- 517 22. Cheek Pouches. in *The International Encyclopedia of Primatology* (eds. Bezanson, M. et  
518 al.) **47**, 1–2 (John Wiley & Sons, Inc., 2016).
- 519 23. Mau, M., Südekum, K.-H., Johann, A., Sliwa, A. & Kaiser, T. M. Indication of higher salivary  
520 alpha-amylase expression in hamadryas baboons and geladas compared to chimpanzees

- 521 and humans. *J. Med. Primatol.* **39**, 187–190 (2010).
- 522 24. Rylands, A. B. Habitats, feeding ecology, and home range size in the genus *Callithrix*.  
523 *Marmosets and tamarins: Systematics, behaviour, and ecology* (1993).
- 524 25. Wright, P. C. The behavior and ecology of the owl monkey. *Aotus: The owl monkey* 97–112  
525 (1994).
- 526 26. Casper, J. *et al.* The UCSC Genome Browser database: 2018 update. *Nucleic Acids Res.*  
527 **46**, D762–D769 (2018).
- 528 27. Mandel, A. L., Peyrot des Gachons, C., Plank, K. L., Alarcon, S. & Breslin, P. A. S.  
529 Individual differences in *AMY1* gene copy number, salivary  $\alpha$ -amylase levels, and the  
530 perception of oral starch. *PLoS One* **5**, e13352 (2010).
- 531 28. Peyrot des Gachons, C. & Breslin, P. A. S. Salivary Amylase: Digestion and Metabolic  
532 Syndrome. *Curr. Diab. Rep.* **16**, 102 (2016).
- 533 29. Davenport, E. R. Tooth Be Told, Genetics Influences Oral Microbiome. *Cell Host Microbe*  
534 **22**, 251–253 (2017).
- 535 30. Scannapieco, F. A., Bergey, E. J., Reddy, M. S. & Levine, M. J. Characterization of salivary  
536 alpha-amylase binding to *Streptococcus sanguis*. *Infect. Immun.* **57**, 2853–2863 (1989).
- 537 31. Xu, D. *et al.* Recent evolution of the salivary mucin *MUC7*. *Sci. Rep.* **6**, 31791 (2016).
- 538 32. Pajic, P., Lin, Y.-L., Xu, D. & Gokcumen, O. The psoriasis-associated deletion of late  
539 cornified envelope genes *LCE3B* and *LCE3C* has been maintained under balancing  
540 selection since Human Denisovan divergence. *BMC Evol. Biol.* **16**, 265 (2016).
- 541 33. Stamatakis, A. RAxML version 8: a tool for phylogenetic analysis and post-analysis of large  
542 phylogenies. *Bioinformatics* **30**, 1312–1313 (2014).
- 543 34. Rambaut, A. FigTree v1. 4. *Molecular evolution, phylogenetics and epidemiology*.  
544 *Edinburgh, UK: University of Edinburgh, Institute of Evolutionary Biology* (2012).
- 545 35. Kilian, M. & Nyvad, B. Ability to bind salivary alpha-amylase discriminates certain viridans  
546 group streptococcal species. *J. Clin. Microbiol.* **28**, 2576–2577 (1990).

- 547 36. Papadantonakis, S., Poirazi, P. & Pavlidis, P. CoMuS: Simulating coalescent histories and  
548 polymorphic data from multiple species. *Mol. Ecol. Resour.* (2016). doi:10.1111/1755-  
549 0998.12544
